1  
2  
3  
4  
5  
6  
7  
8  
9  
10  
11  
12  
13  
14  
15  
16  
17  
18  
19  
20  
21  
22  
23  
24  
25  
26  
27  
28

# **Extracellular appendages govern spatial dynamics and growth of *Caulobacter crescentus* on a prevalent biopolymer**

Vanessa R Povolo<sup>1,2\*</sup>, Glen G D'Souza<sup>1,2</sup>, Andreas Kaczmarczyk<sup>3</sup>, Astrid KM Stubbusch<sup>1,2,4</sup>, Urs Jenal<sup>3</sup> and Martin Ackermann<sup>1,2</sup>

<sup>1</sup> Department of Environmental Systems Sciences, Institute of Biogeochemistry and Pollutant Dynamics, ETH Zurich, 8006 Zurich, Switzerland

<sup>2</sup> Department of Environmental Microbiology, Eawag: Swiss Federal Institute of Aquatic Sciences, 8600 Duebendorf, Switzerland

<sup>3</sup> Biozentrum, University of Basel, 4056 Basel, Switzerland

<sup>4</sup> Geobiology, Geological Institute, ETH Zurich, 8006 Zurich, Switzerland

ORCID:

VP: 0000-0001-6691-8787

GD: 0000-0002-9123-101X

AK: 0000-0002-6616-1777

AS: 0000-0003-4767-2712

UJ: 0000-0002-1637-3376

MA: 0000-0003-0087-4819

Corresponding author: Vanessa R Povolo

Address: Eawag, Ueberlandstrasse 133, 8600 Duebendorf, Switzerland

Email: [vanessa.povolo@eawag.ch](mailto:vanessa.povolo@eawag.ch)

29 ABSTRACT

30

31 Microbial breakdown of carbon polymers is an essential process in all ecosystems. Carbon  
32 polymers generally require extracellular breakdown by secreted exoenzymes. Exoenzymes  
33 and breakdown products can be lost through diffusion or flow. This diffusional loss is reduced  
34 when bacteria grow in surface-associated populations where they benefit from each other's  
35 metabolic activities. The aquatic organism *Caulobacter crescentus* was recently shown to form  
36 clonal microcolonies on the carbon polymer xylan, but to grow solitary on the monosaccharide  
37 xylose. The underlying mechanisms of this substrate-mediated microcolony formation are  
38 unknown. In particular, the importance of extracellular appendages such as pili, adhesive  
39 holdfast, and flagellum in governing the spatial arrangement of surface-grown cells is unclear.  
40 Using microfluidics coupled to automated time-lapse microscopy and quantitative image  
41 analysis, we compared the temporal and spatial dynamics of *C. crescentus* wildtype and  
42 mutant strains grown on xylan, xylose, or glucose. We found that mutants lacking type IV pili  
43 or holdfast showed altered spatial patterns in microcolonies and were unable to maintain cell  
44 densities above a threshold required for maximal growth rates on the xylan polymer, whereas  
45 mutants lacking flagella showed increased cell densities that potentially lead to increased local  
46 competition. Our results demonstrate that extracellular appendages allow bacteria to reach  
47 local cell densities that maximize single-cell growth rates in response to their nutrient  
48 environment.

## 49 INTRODUCTION

50

51 The majority of the carbon available to bacteria in their natural environments is in the form  
52 of carbon polymers that are too large to be taken up directly by bacterial cells (1, 2). Bacteria  
53 secrete extracellular enzymes, such as chitinases or xylanases, to degrade polymers like chitin  
54 or xylan into oligomers and monomers that can be taken up and metabolized (1, 2). Microbial  
55 breakdown of carbon polymers lies at the heart of remineralization, the degradation of  
56 organic matter (3), and is a relevant process in the human gut (4, 5) and most of Earth's  
57 ecosystems (1).

58       Secreted compounds for nutrient assimilation, such as metal chelators or exoenzymes  
59 for the breakdown of carbon polymers, as well as their breakdown products can be lost  
60 through diffusion and flow (6). This diffusional loss is reduced when cells grow in dense groups.  
61 In such groups, a larger fraction of the breakdown products can be taken up by cells instead  
62 of being lost by diffusion or flow (7-10). On the other hand, cells in spatial proximity might  
63 suffer from competition for resources (7, 11-13). A recent mathematical model investigated  
64 the cost-benefit ratio for secreting extracellular compounds for the acquisition of resources  
65 from the environment (7). According to the model, there is an intermediate cell-to-cell  
66 distance that maximizes the benefits of secretion. While competition prevails if cells are too  
67 densely packed, the synergistic effect of resource sharing declines with increasing cell-to-cell  
68 distance (7). In analogy, it is conceivable that to optimize growth on carbon polymers, bacteria  
69 need to maintain adequate intermediate cell densities when grown on surfaces.

70       If intermediate cell-to-cell distance maximizes growth rates on extracellular digested  
71 resources, one would expect bacteria to aggregate when growing on polymers. We previously  
72 tested this hypothesis with *C. crescentus*, a bacterium that is involved in the degradation of  
73 carbon polymers in a range of aquatic and terrestrial environments (14) and is therefore well-

74 suited as an experimental system to investigate the role of aggregation during growth on  
75 polymers. These experiments showed that *C. crescentus* switches between aggregation and  
76 dispersal depending on whether it grows on polysaccharide or monosaccharide substrates  
77 (10). Observations at the single-cell level revealed that cells form clonal microcolonies on the  
78 plant polysaccharide xylan, but exhibit a planktonic lifestyle when grown on the  
79 monosaccharide xylose. Xylan is degraded by xylanases that localize to the bacterial cell  
80 envelope, and *C. crescentus* in microcolonies potentially benefit from collective xylanase  
81 activity and access to breakdown products (10).

82       Microbial aggregation is typically mediated by adhesive structures on the bacterial  
83 surface, such as pili, flagella or exopolysaccharides (15, 16). In *C. crescentus*, the formation of  
84 such adhesive structures is tightly coupled with its cell cycle (17). Each division gives rise to  
85 two morphologically and physiologically distinct cell types, a sessile stalked and a motile  
86 swarmer cell (**Fig. 1a**). Stalked cells attach to solid substrates via an adhesive holdfast located  
87 at the tip of their stalk (18, 19), a polar cell extension thought to contribute to nutrient uptake  
88 (20, 21). Motile swarmer cells carry a flagellum and polar pili and either disperse into new  
89 environments or attach close to their stalked mothers (17, 22). Irreversible surface  
90 attachment of swarmer cells requires surface sensing through an active flagellum and  
91 retracting pili, culminating in the rapid synthesis of an adhesive holdfast, which anchors cells  
92 to the solid substrate (23-27). Thus, flagellum, pili and holdfast together coordinate *C.*  
93 *crescentus* surface colonization, leading to the formation of microcolonies and biofilms (28).  
94 The observation that holdfast production also responds to nutritional signals (29) argues that  
95 *C. crescentus* integrates internal and external cues to regulate surface attachment and  
96 optimize growth conditions.

97 Here, we investigate the formation of *C. crescentus* microcolonies on xylan with the specific  
98 goal to scrutinize the role of its extracellular appendages to reach optimal cell densities on  
99 surfaces for effective polymer degradation. Combining microfluidics with automated time-  
100 lapse microscopy and quantitative image analysis, we provide new insights into how surface  
101 appendages of individual microbial cells can drive the spatial organization of communities,  
102 thereby optimizing their collective growth and metabolism.

## 103 RESULTS AND DISCUSSION

104

### 105 ***C. crescentus* microcolony formation on xylan depends on holdfast and type IV pili**

106 We have recently found that the type of carbon source present influences the growth  
107 behavior of *C. crescentus* CB15 in microfluidic growth chambers (10). On the polymeric carbon  
108 source xylan, wildtype cells grew in dense groups of cells, so-called microcolonies, whereby  
109 all cells within a microcolony originated from a single founder cell (Fig. 1b, wildtype). In  
110 contrast, on the monosaccharides xylose and glucose, cells dispersed (Fig. 1c,d, wildtype). The  
111 spatial proximity of cells in microcolonies might provide a potential benefit for growth on a  
112 polymer like xylan by increasing their collective degradative activity and their access to  
113 breakdown products from neighboring cells.

114 Establishment of spatial proximity and the formation of microcolonies likely requires  
115 adhesive structures. To examine the role of *C. crescentus* extracellular appendages in the  
116 growth behaviors observed on different carbon sources, we used single gene knockout strains  
117 in *pilA*, *hfsA* or *flgH* to disrupt formation of type IV pili, holdfast or the flagellum, respectively.  
118 Type IV pili and the flagellum have been implicated in sensing initial surface contact and  
119 triggering a response that ultimately leads to irreversible attachment via c-di-GMP mediated-  
120 holdfast production (23-27). We performed experiments in a previously described  
121 microfluidics setup, in which growth chambers are connected to a main channel (10, 30, 31).  
122 Within the chambers, cells could only grow in a monolayer and were supplied with minimal  
123 salt medium containing either xylan, xylose, or glucose. We used time-lapse microscopy and  
124 automated image analysis to track the location and growth rate of the individual cells in this  
125 controlled and spatially structured microenvironment (10, 30, 31). In terms of natural habitats  
126 of *C. crescentus* the experimental setup resembles aquatic environments without strong flow  
127 or wet soil ecosystems (14, 32).

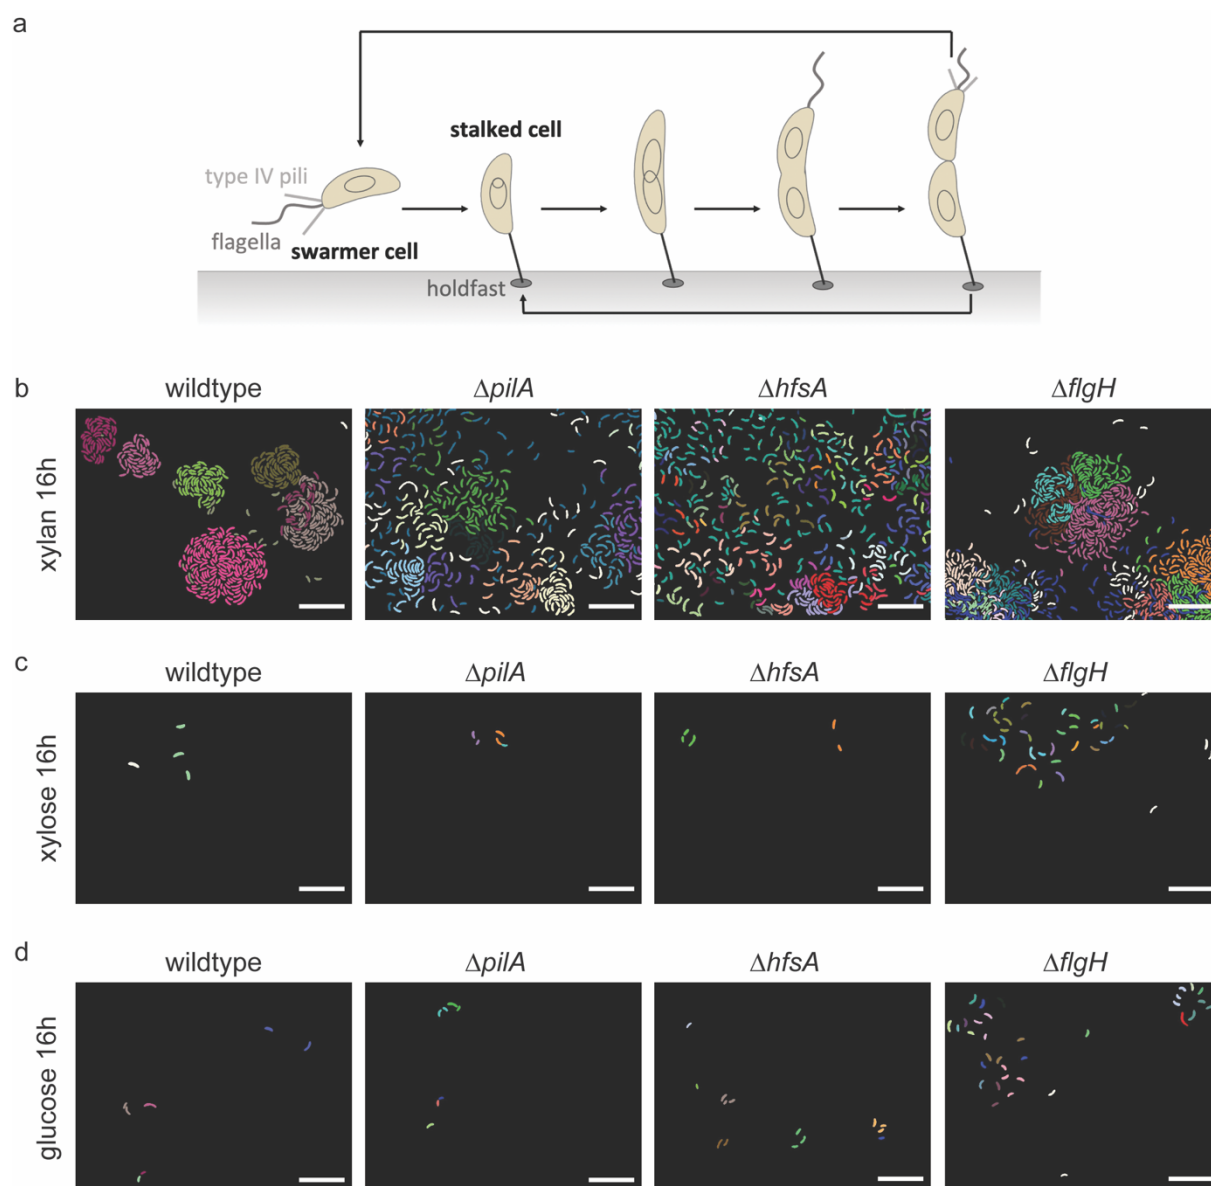

128

129

130 **Figure 1 | *C. crescentus* spatial growth dynamics differ in microfluidic growth chambers depending**

131 **on the carbon source present and are modulated by extracellular appendages.** (a) Schematic

132 representation of the *C. crescentus* life cycle. Representative segmented and tracked microscopy

133 images of *C. crescentus* CB15 wildtype and mutant strains growing on the carbon sources (b) xylan, (c)

134 xylose, and (d) glucose for 16 hours in microfluidic growth chambers. Cells depicted in the same color

135 within one image originate from the same progenitor cell. Scale bars correspond to 10  $\mu m$ . The

136 corresponding time-lapse segmented images are provided in the supplementary information

137 **(Supplementary Movie S1-12).**

138

139 We found that extracellular appendages, such as pili and holdfast, were essential for the  
140 microcolony formation on xylan. Lack of type IV pili (**Fig. 1b,  $\Delta pilA$** ) or a holdfast (**Fig. 1b,**  
141  **$\Delta hfsA$** ) prevented the formation of dense microcolonies on xylan (quantitative analysis of the  
142 spatial distribution is shown below). Loss of flagella, on the other hand, did not impact  
143 microcolony formation (**Fig. 1b,  $\Delta flgH$** ), with cells showing similar spatial arrangement to  
144 wildtype cells (**Fig. 1b, wildtype**). In contrast to the behavior on the complex polymer xylan,  
145 cells growing on the monomeric carbon sources xylose and glucose did not form  
146 microcolonies. On xylose and glucose, loss of type IV pili (**Fig. 1c,d,  $\Delta pilA$** ) or holdfast (**Fig. 1c,d,**  
147  **$\Delta hfsA$** ) did not influence the spatial arrangement of cells compared to wildtype cells in any  
148 obvious way (**Fig. 1c,d, wildtype**). Microcolony formation was also absent in the  $\Delta flgH$  mutant  
149 strain (**Fig. 1c,d,  $\Delta flgH$** ) when grown on xylose or glucose, but we observed the formation of  
150 rosettes, in which multiple cells were attached to each other through their holdfasts at the  
151 tips of their stalks (33, 34) (**Supplementary Figure S1**). In rosettes, the cells are organized  
152 concentrically around their holdfasts, whereas in microcolonies cells form dense aggregates  
153 without clear concentric organization and irrespective of intercellular attachment.

154 Comparing the rates of cell number increase per growth chamber between the different  
155 strains growing on xylan further supported the essential role of the holdfast in surface  
156 colonization. To quantitatively describe microcolony formation on xylan, we derived the  
157 temporal dynamics of cell numbers per growth chamber using an image analysis workflow for  
158 segmentation and tracking of single cells, from which we quantified the increase in cell  
159 number over time based on an exponential model (**Supplementary Table S1**). The cell number  
160 within a microfluidic chamber is a function of growth rate, emigration and immigration rate  
161 of cells (discussed in more detail in the next paragraph). Cell numbers in the individual growth  
162 chambers doubled every  $2.8 \pm 0.2$  h (mean  $\pm$  95%-CI) for wildtype,  $2.9 \pm 0.4$  h (mean  $\pm$  95%-



163 CI) for  $\Delta flgH$ ,  $3.0 \pm 0.3$  h (mean  $\pm$  95%-CI) for  $\Delta pilA$ , and  $3.5 \pm 0.4$  h for  $\Delta hfsA$  (**Fig. 2a**;  
164 **Supplementary Figure S2**). We found that  $\Delta hfsA$  cell numbers increased significantly more  
165 slowly than those of the wild type (parametric  $t$ -test comparing the exponential growth  
166 parameter;  $p = 0.003$ ; **Supplementary Table S2**), whereas  $\Delta pilA$  and  $\Delta flgH$  cell numbers  
167 increased similar to those of wildtype ( $p = 0.381$ , resp.  $p = 0.93$ ; **Supplementary Table S2**).  
168 Thus, holdfast seems the major determinant of enhanced surface colonization on xylan,  
169 whereas type IV pili play a more accessory role in spatial patterning of microcolonies.  
170

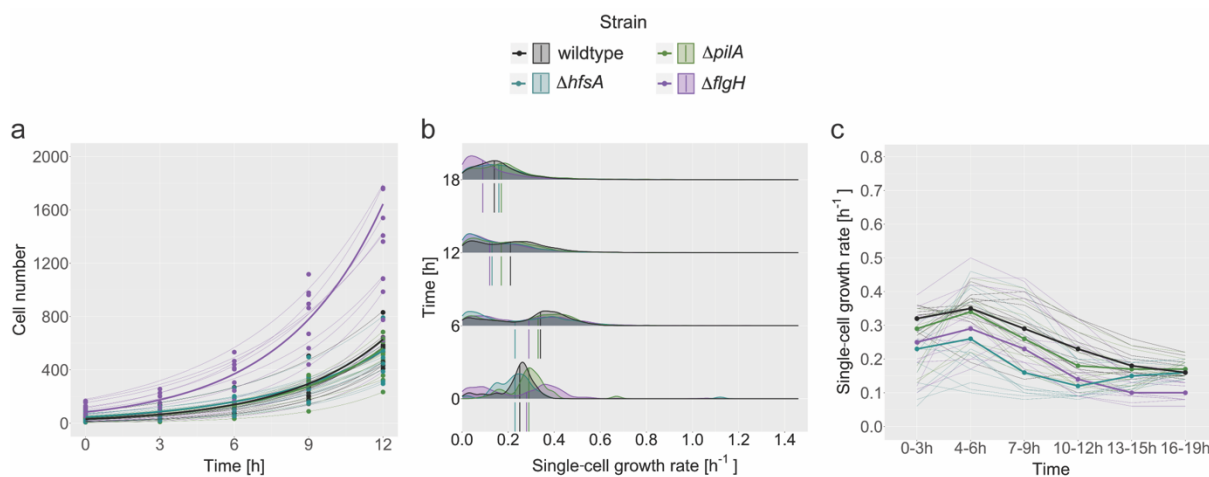

171 **Figure 2 | Xylan promotes surface colonization.** (a) Cell number per microfluidic growth chamber over  
172 time for each strain on xylan. The increase in cell number for each chamber was described with an  
173 exponential model (**Supplementary Table S1**) and shown by a thin line ( $R^2 > 0.97$ ). Thick lines depict  
174 the exponential regression lines using the mean parameter values determined in the model functions  
175 for the individual chambers. (b,c) Single-cell growth rates over time for the different strains on xylan.  
176 (b) Density plots show the distributions of single-cell growth rates at four timepoints, i.e. 0 h, 6 h, 12  
177 h, and 18 h for the different strains. The vertical lines within and below the density functions depict  
178 the median values for each strain. (c) Median values for single-cell growth rates over time for each  
179 strain on xylan (**Supplementary Table S3**). Thin lines indicate the median single-cell growth rate  
180 trajectories of individual chambers. All graphs include data from 12 chambers, 4 per each of the 3  
181 biological replicates, for each strain.  
182

183

184

## 185 **Xylan promotes surface colonization**

186 We found that the observed increase in cell number per chamber on xylan matches the  
187 expected cell number increase based on the single-cell growth rates. Differences in the rate of  
188 increase of cell number within the chambers may arise because of differences in the cell  
189 growth rate itself, or differences in the rate of emigration when swarmer cells leave the  
190 chamber (our observations suggest that immigration is negligible, **Supplementary Movies S1-**  
191 **12**). In the absence of cell emigration, the doubling times derived from the observed increase  
192 in cell number within the chambers should be equal to the doubling times estimated directly  
193 from the single-cell growth rates. Emigration, on the other hand, would increase the doubling  
194 times retrieved from the observed increase in cell number within the chambers. To determine  
195 the contribution of single-cell growth rates and emigration to the overall population growth,  
196 we used the data from single-cell segmentation and tracking to estimate the single-cell growth  
197 rates based on the increase in cell area from one cell division to the next. The single-cell  
198 growth rates of all tested *C. crescentus* strains growing on xylan (**Fig. 2b,c**) reach a peak in the  
199 first six hours with values of  $0.31 \pm 0.04 \text{ h}^{-1}$  (mean  $\pm$  sd of all strains combined) and then  
200 decrease to values of  $0.15 \pm 0.03 \text{ h}^{-1}$  (mean  $\pm$  sd of all strains combined) (**Supplementary Table**  
201 **S3**). Single-cell growth rates for the monosaccharides xylose and glucose are shown in the  
202 supplementary information (**Supplementary Figure S3, Supplementary Table S4 and S5**).  
203 Note that the single-cell growth rates on the monosaccharides were considerably lower than  
204 the ones on xylan. One likely reason for this is differences in the total carbon concentrations,  
205 so that growth rates in the different conditions cannot be directly compared (for details, see  
206 the Bacterial strains and growth conditions section in Materials and Methods). We derived  
207 exponential growth models from the average single-cell growth rates over the first 12 hours  
208 to obtain the predicted doubling times (**Supplementary Figure S4**) and compared these with

209 the observed doubling times for cell numbers per chamber over the first 12 hours (**Fig. 2a;**  
210 **Supplementary Figure S2**). For xylan, the doubling times predicted from the single-cell growth  
211 rates were very similar to the observed doubling times for the increase in cell number, while  
212 for xylose and glucose, observed doubling times were substantially higher than those  
213 predicted from single-cell growth rates (range of doubling time ratios across replicates: xylan,  
214 1.08–1.15; xylose, 1.97–5.92; glucose, 2.14–3.75). An increased doubling time (corresponding  
215 to a reduced rate of cell number increase) in comparison with that predicted from the single-  
216 cell growth rates suggests higher emigration rates and hence dispersal of bacteria growing on  
217 the monosaccharides. It also suggests that xylan enhances surface colonization.

218

### 219 **Holdfast and type IV pili contribute to higher local cell density on xylan**

220 The ability of *C. crescentus* cells to form dense microcolonies might contribute to their higher  
221 growth rate on xylan. To understand the temporal dynamics of microcolony formation, we  
222 generated spatial lineage trees using the position and lineage information of individual cells  
223 derived by single-cell segmentation and tracking. The spatial lineage tree for wildtype cells  
224 growing on xylan (**Fig. 3a**) showed that microcolonies were clonal and formed as a result of  
225 swarmer cells not dispersing after division. The same behavior was observed for the  
226 microcolonies formed by the mutant without a flagellum ( $\Delta flgH$ ) (**Fig. 3d**). Loss of type IV pili  
227 ( $\Delta pilA$ ) or holdfast ( $\Delta hfsA$ ) impeded microcolony formation on xylan. The lineage trees of the  
228  $\Delta pilA$  (**Fig. 3b**) and  $\Delta hfsA$  (**Fig. 3c**) mutants imply that although the swarmer cells do not settle  
229 next to their progenitor stalked cell, they tend to stay within the chamber. In this case, it is  
230 possible that the presence of xylan still serves as a cue to cells to form microcolonies, but the  
231 lack of either type IV pili or holdfast prevents swarmer cells from differentiating in proximity  
232 of the stalked cell that initiated the cell division. Type IV pili are especially important for the

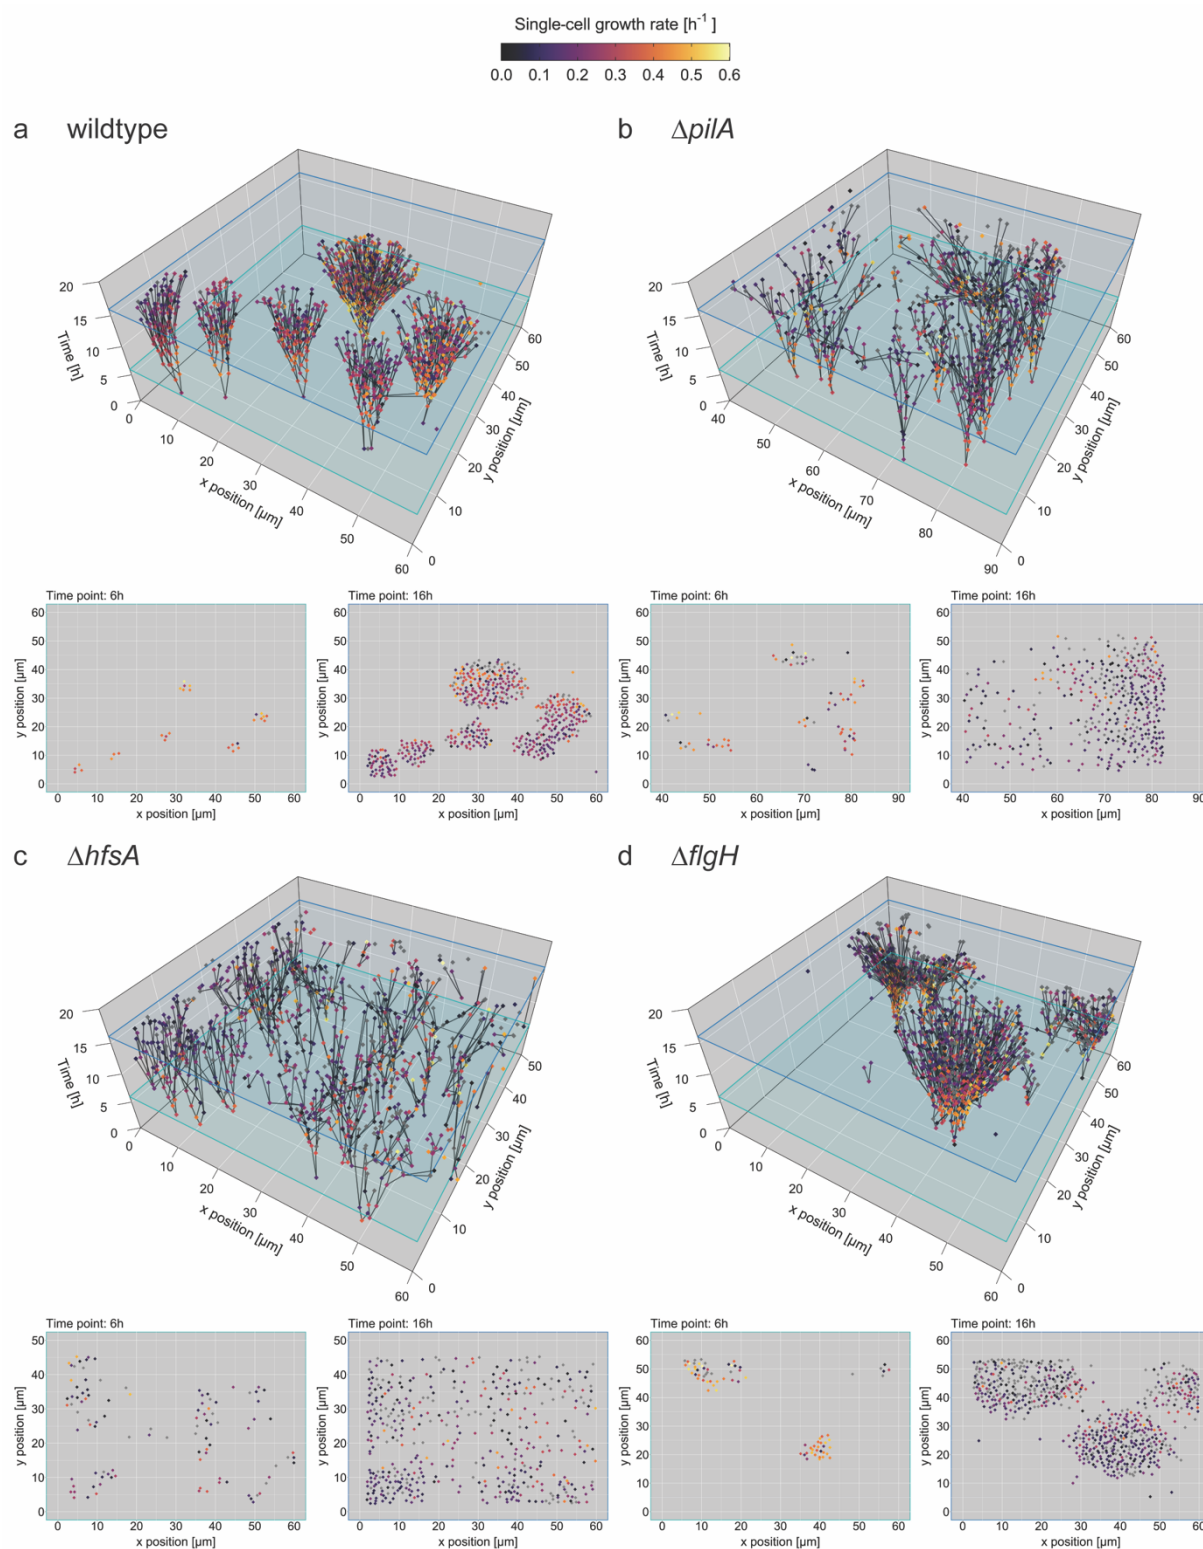

233

234

235 **Figure 3 | Swarmer cells stay close to their progenitor on xylan.** Spatial lineage trees reconstructed  
236 for representative microfluidic growth chambers for (a) wildtype, (b)  $\Delta pilA$ , (c)  $\Delta hfsA$ , (d)  $\Delta flgH$  cells  
237 growing on xylan. Single cells are plotted as dots at their specific location within the growth chamber  
238 (x and y axes) at a specific time (z axis) and colored according to their growth rate. Cells are connected

239 with their progenitor cell by black lines. Branching points depict cell division events. Representative  
240 2D planes through the spatial lineage trees at two specific time points (6 h and 16 h) are shown below  
241 the 3D plots.

242

243 initial attachment of *C. crescentus* cells, while the holdfast is required for long-term stable  
244 attachment to a surface (18, 25). In terms of microcolony formation on xylan, lack of either  
245 type IV pili or holdfast likely prevents physical anchoring of emerging swarmer cells close to  
246 their parental stalked cells during the swarmer-to-stalked cell transition.

247 These results show that the spatial distribution and hence the local cell density  
248 experienced by the individual cells is modulated by the extracellular appendages. In order to  
249 quantify the observed modulation of the spatial distribution, we derived a proxy for the spatial  
250 cell density experienced by each individual cell. To do so, we determined the number of all  
251 neighbors of each cell in the growth chamber, while giving a higher weight to close neighbors  
252 and a lower weight to more distant neighbors. We used the inverse distance squared as a  
253 weight (for details, see the Data analysis section in Materials and Methods).

254 The local cell density experienced by cells did indeed vary according to the carbon source  
255 and the extracellular appendages possessed by the cells. On xylan (**Fig. 4a,d**), cells reached  
256 weighted densities of  $9.23 \pm 4.84 \mu\text{m}^{-2}$  (mean  $\pm$  sd), while on xylose (**Fig. 4b,e**) and glucose  
257 (**Fig. 4c,f**) the weighted densities reached values of  $1.2 \pm 0.25 \mu\text{m}^{-2}$  and  $1.01 \pm 0.16 \mu\text{m}^{-2}$ ,  
258 respectively (**Supplementary Table S3-5**). Weighted density differed significantly between  
259 strains on xylan (ANOVA,  $F = 13.17$ ,  $p = 0.0048$ ; **Supplementary Table S6**), but not on xylose  
260 ( $F = 1.64$ ,  $p = 0.1946$ ) or glucose ( $F = 1.22$ ,  $p = 0.3623$ ). The strains can be divided into two  
261 groups based on their weighted density, with wildtype and  $\Delta flgH$  growing to significantly  
262 higher weighted density values on xylan than  $\Delta pilA$  and  $\Delta hfsA$  ( $p \leq 0.011$  in all cases, Tukey's  
263 multiple comparison test, **Supplementary Table S7**). This analysis of the weighted density

264 supports our qualitative findings described above, that the holdfast and type IV pili are  
 265 essential to form dense microcolonies on xylan. Both extracellular appendages are known to  
 266 be involved in surface attachment of *C. crescentus* (18, 35), and lack of either one might  
 267 prevent the swarmer cell from efficiently attaching close to the stalked cell after division.  
 268

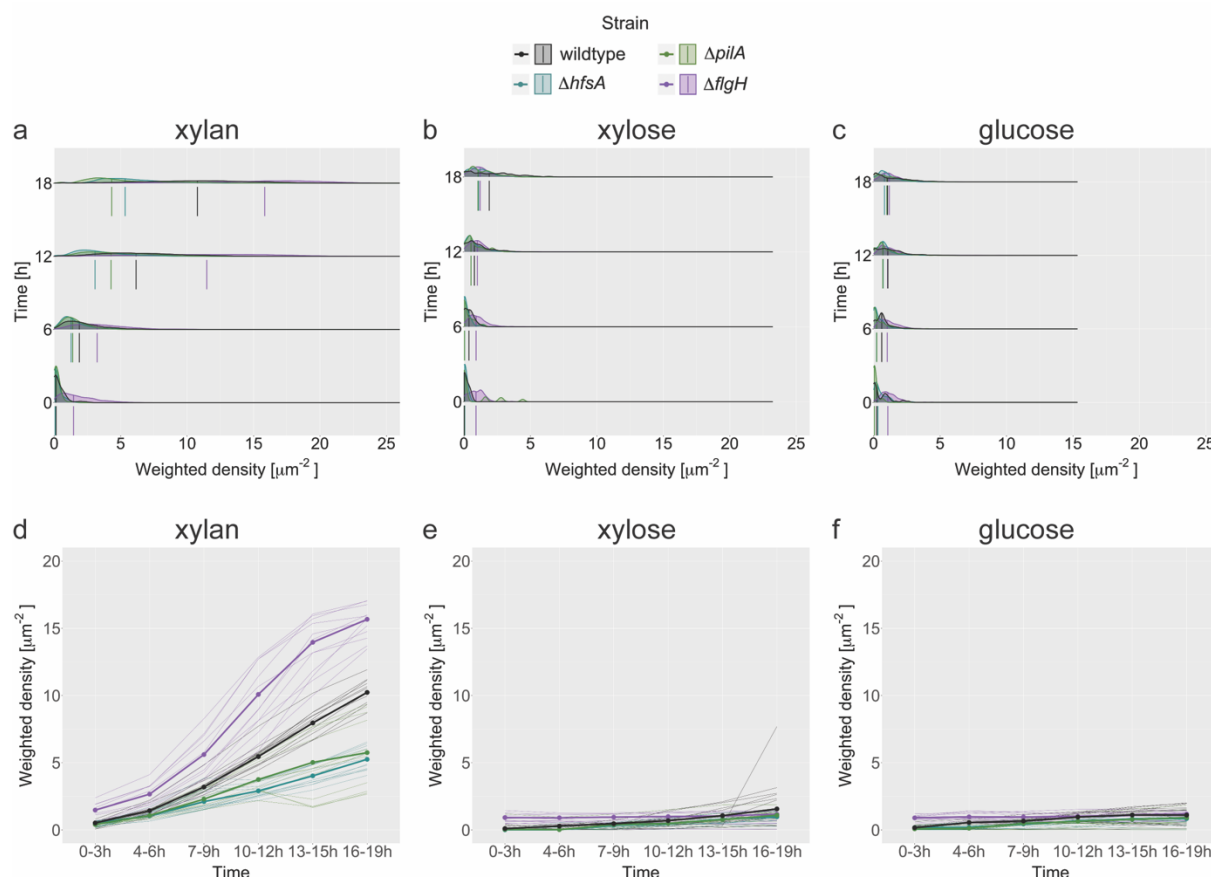

269  
 270  
 271 **Figure 4 | Deletion of type IV pili or holdfast decreased the cell density in microcolonies.** Weighted  
 272 density of single-cells over time on (a,d) xylan, (b,e) xylose, and (c,f) glucose for the different strains.  
 273 The weighted density of a single cell was calculated by taking the sum over the inverse distance square  
 274 to all other cells present. Density plots show the distributions of weighted density at four timepoints,  
 275 i.e. 0 h, 6 h, 12 h, and 18 h on (a) xylan, (b) xylose, and (c) glucose. The vertical lines within and below  
 276 the density functions depict the median values for each strain. The median weighted density over time  
 277 for (d) xylan, (e) xylose, and (f) glucose for each strain (**Supplementary Table S3-5**). Fine lines indicate  
 278 the median weighted density of single growth chambers. All graphs include data from 12 chambers, 4  
 279 per each of the 3 biological replicates, for each strain and carbon source.  
 280

281 **Intermediate cell densities achieved by wildtype cells are associated with higher growth**  
282 **rates on xylan**

283 Our above-described results suggested that holdfast and type IV pili influence the overall  
284 growth rate of microcolonies by retaining daughter cells close to their mother cells upon cell  
285 division. In addition, previous theoretical results (7) indicate that local cell density is important  
286 for the growth rate of individual cells and that intermediate densities might maximize growth  
287 rates on carbon polymers by balancing the benefits (synergy) and costs (competition) of  
288 proximity. Thus, we sought to test whether the local cell density experienced by individual  
289 cells within a microcolony also influenced their individual growth rates.

290 We found a link between the single-cell growth rates and the experienced local cell  
291 density of individual cells that was determined by the extracellular appendages. On xylan,  
292 single-cell growth rates reached a maximum at an intermediate weighted density of around  
293  $7.5 \mu\text{m}^{-2}$  (**Fig. 5, Supplementary Table S8**). We found that this finding was robust to changing  
294 how the proxy for the weighted density was calculated (**Supplementary Figure S6**). We  
295 performed the same analysis for the monosaccharides xylose and glucose and found weaker  
296 relationships between weighted density and single-cell growth rate (**Supplementary Figure**  
297 **S6**).

298 Our results indicate that all three investigated extracellular appendages of *C. crescentus*  
299 contribute to governing the optimal cell density for the growth on the polysaccharide xylan.  
300 We found that wildtype cells reached intermediate cell densities that maximized their growth  
301 rate, while  $\Delta pilA$  and  $\Delta hfsA$  strains reached lower densities and hence tended to grow at lower  
302 growth rates. The  $\Delta flgH$  mutant grew to higher densities than the wildtype and hence also  
303 tended to grow at lower growth rates (**Fig. 5**). Differences in the single-cell growth rates  
304 between the strains were not significant (ANOVA,  $p = 0.186$ , **Supplementary Table S6**, Tukey's

305 multiple comparison test, **Supplementary Table S7**), but we found a clear trend of decreasing  
306 growth rates from wildtype over  $\Delta pilA$  and  $\Delta hfsA$  to  $\Delta flgH$  (**Supplementary Figure S5**). Our  
307 results provide evidence that type IV pili, holdfast, and flagella facilitate growth at  
308 intermediate distances that maximize growth rates of individual cells on xylan.

309

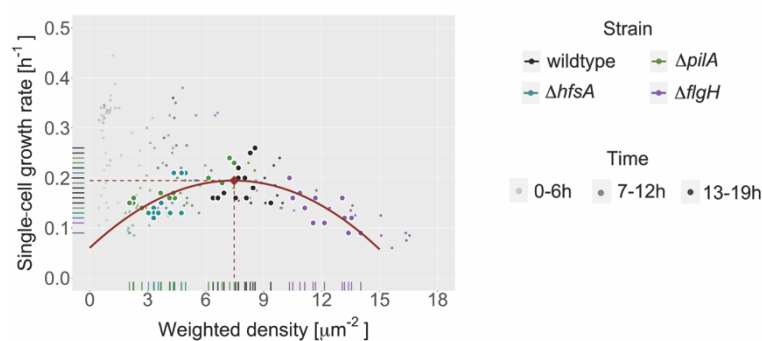

310

311 **Figure 5 | Intermediate cell densities lead to higher growth rates on xylan.** Median values of single-  
312 cell growth rate and weighted density plotted against each other. Larger points with white border  
313 represent time-averages of single growth chambers. Smaller points show single growth chambers at a  
314 specific time window indicated by the degree of transparency. The distribution of the median chamber  
315 values was fitted using a quadratic regression model (**Supplementary Table S8**) and depicted in red  
316 (adj-R2 = 0.49). The found correlation is robust across different density measures (**Supplementary**  
317 **Figure S6**). The maximum of the quadratic regression line is indicated with a diamond shaped point in  
318 red ( $y_{\max} = (7.47, 0.19)$ ). The data stems from 12 chambers, 4 per each of the 3 biological replicates, for  
319 each strain.

320

321 In conclusion, our findings imply that forming microcolonies with intermediate cell densities  
322 can be beneficial for *C. crescentus* cells, allowing them to reach maximal single-cell growth on  
323 the polysaccharide xylan. Wildtype *C. crescentus* converged around the optimal cell density,  
324 while lack of type IV pili, holdfast, or flagellum prevented cells from achieving the optimal  
325 weighted density. It is, however, important to consider that the single-cell growth rates  
326 dynamically changed over time, suggesting that additional factors than cell density and the  
327 presence or absence of the extracellular structures influence growth on xylan. Our results



328 indicate that extracellular structures help *C. crescentus* to maintain optimal cell densities  
329 when growing on polymers in an experimental setup that recapitulates the surface-associated  
330 growth that microbes frequently experience in their natural environment (36).

## 331 CONCLUSIONS

332

333 Analyzing bacterial behavior under experimental conditions mimicking important aspects of  
334 natural environments can improve our understanding of microbial ecology. In combination  
335 with genetic model systems, such an approach allows investigating the functional relevance  
336 of specific molecular, cellular and behavioral traits for the overall growth and survival of  
337 bacteria in their environment. *C. crescentus* is an extensively studied extensively model  
338 system that has resulted in the discovery of many regulatory processes involved in  
339 coordinating growth, division and behavior (37, 38). In contrast, the understanding of how *C.*  
340 *crescentus* optimizes growth and survival in its natural environment is still limited. In this  
341 study, we aimed to shed further light into changes in bacterial growth dynamics in response  
342 to different nutrient environments and identify the involved cellular structures. Our data  
343 suggests that depending on the carbon source different spatial cell densities result in maximal  
344 single-cell growth. Optimal density is likely more relevant for nutrients that require  
345 extracellular degradation, such as the studied carbon polymer xylan studied here.  
346 Furthermore, we demonstrated that extracellular appendages involved in surface adhesion  
347 impact the spatial proximity of cells. In the natural habitat of bacteria, most carbon sources  
348 require extracellular breakdown (1, 2) and the ability of growing in spatial proximity likely  
349 makes this degradation process more efficient. Microbial decomposition of carbon polymers  
350 is essential for the global biogeochemical cycles (3) and an important process in the human  
351 gut (4, 5). Our study provided a better understanding of how bacteria adapt to different  
352 nutrient sources, such as monosaccharides and polysaccharides, to balance benefits and costs  
353 of group formation.

## 354 MATERIALS AND METHODS

355

### 356 **Bacterial strains and growth conditions**

357 Experiments were performed using *Caulobacter crescentus* CB15 wildtype (10),  $\Delta pilA$  (39),  
358  $\Delta hfsA$  (UJ9035 from Urs Jenal, University of Basel, Switzerland), and  $\Delta flgH$  (UJ8848 from Urs  
359 Jenal, University of Basel, Switzerland) mutants. We used the pXGFPC-2 *Plac::mKate2* plasmid  
360 (22) to introduce a fluorescent phenotypic marker by electroporation, as described previously  
361 (22). Chromosomal recombinants were selected using kanamycin resistance and tested for  
362 fluorescence expression.

363 Cells were routinely grown on Peptone Yeast Extract (PYE) agar supplemented with 20  
364  $\mu\text{g/ml}$  kanamycin or in M2 minimal salts medium containing xylose (0.05% w/v), glucose  
365 (0.05% w/v), or xylan (0.1% w/v). Stock solutions of xylose (20% w/v, Sigma Aldrich), glucose  
366 (20% w/v, Sigma Aldrich), and xylan (2% w/v, Megazyme) were prepared with nanopure water  
367 and filter sterilized using 0.4  $\mu\text{m}$  surfactant-free cellulose acetate filters (Corning). Overnight  
368 cultures were prepared by inoculating a 15 ml culture tube containing M2 minimal salts  
369 medium containing glucose (M2G) with a single bacterial colony from PYE agar.

370

### 371 **Microfluidics**

372 Microfluidics experiments were performed as described previously (10, 30, 31). Microfluidic  
373 devices were designed with chambers of  $60 \times 60 \times 0.56 \mu\text{m}$  or  $60 \times 120 \times 0.56 \mu\text{m}$  (length x  
374 width x height) that were open on one side (60 or 120  $\mu\text{m}$ ) to a 100  $\mu\text{m}$  wide feeding channel  
375 of 22  $\mu\text{m}$  height. Polydimethylsiloxane elastomers (PDMS, Sylgard 194 Silicone Elastomer Kit,  
376 Dow Corning) were prepared with a 1:8 ratio and poured onto a wafer. The mix was degassed  
377 using a desiccator and then baked for 2 h at 80 °C for curing. PDMS chips were cut out using a  
378 scalpel. Inlets and outlets of 0.75 mm diameter for medium were punched into the feeding

379 channel. PDMS chips were bound to round glass coverslips of 50 mm diameter (No. 1, Menzel-  
380 Gläser) using a Plasma Cleaner (PDC-32G-2, Harrik Plasma) for 30 s at maximum power. A  
381 thermal plate at 100 °C was used to stabilize the bonding.

382 Overnight cultures of *C. crescentus* CB15 strains were grown at 30 °C with shaking (220  
383 rpm) in M2G to an OD<sub>600</sub> of around 0.2. Aliquots of 1 ml of this cell suspension were  
384 centrifuged (13'000 rpm, 2 min), the cells were washed twice with M2 minimal salts medium  
385 and resuspended in 100 µl of M2 minimal salts medium. Using a 10 µl pipette, cells were  
386 loaded into the PDMS chip.

387 To provide the carbon source during experiments, 50 ml luer lock syringes (Pic Solution) were  
388 filled with M2 minimal salts media containing either xylose (0.001% w/v), glucose (0.001%  
389 w/v), or xylan (0.1% w/v) and loaded onto single- or multi-channel syringe pumps (NE-300,  
390 NE-1600 or NE-1800, New Era Pump Systems). The PDMS chip was connected with the  
391 syringes containing the growth media using a combination of 20-G needles (0.9 × 70 mm,  
392 Huberlab), larger tubing (Tygon microbore S54HL, ID 0.76 mm, OD 2.29 mm, Fisher Scientific),  
393 and small tubing (Adtek, ID 0.3 mm, OD 0.76 mm, Fisher Scientific).

394 The inlets of the PDMS chip were connected to the syringes containing the growth media  
395 after loading the cells and small tubing was used to connect the outlets with a waste bottle. A  
396 flow rate of 0.1 ml/h was used for all experiments to ensure constant nutrient supply of the  
397 chambers via diffusion from the channel.

398

### 399 **Time-lapse microscopy**

400 An Olympus IX83 inverted microscope system with automated stage controller (Marzhauser  
401 Wetzlar), shutters, and laser-based autofocus systems (Olympus ZDC 2) was used for  
402 microscopy imaging. Several positions on one PDMS chip were imaged in parallel. Phase-

403 contrast and fluorescence images for every position were taken at 7 min intervals. An UPLFLN  
404 100× oil immersion objective (Olympus) and an ORCA-flash 4.0 v2 or v4 sCMOS camera  
405 (Hamamatsu, Japan) was used for image acquisition. Fluorescence imaging was performed  
406 using a X-Cite120 120 W high pressure metal halide arc lamp (Lumen Dynamics) with a TXRED  
407 fluorescent filter (Chroma). A cellVivo microscope incubation system (Pecon GmbH, Germany)  
408 or Cube incubation system (Life Imaging Services, Switzerland) maintained the growth  
409 conditions in the course of an experiment at 30 °C.

410

#### 411 **Image analysis**

412 Fluorescent channel images were first converted to tiff format using a custom-scripted macro  
413 for Fiji/ImageJ v2.0 (40) and later aligned and cropped to the boundaries of the microfluidic  
414 growth chambers with Matlab v2019b using SuperSegger (41). The resulting images were  
415 deconvolved using a point-spread function (42) and fed into ilastik v1.3.2 (43) for  
416 segmentation and tracking of single cells. Further analysis of the data was performed in R  
417 Studio v2021.09.1 (44) with R v4.1.2. Single-cell growth rates were calculated from the  
418 increase of cell area of a single cell over time by taking the slope of the linearized fitted  
419 exponential model. The weighted cell density was calculated with the R package *spatstat*  
420 v2.2.0 (45) by taking for every cell the sum over the inverse distance square to all other cells  
421 in the chamber for each frame. This was motivated by the fact that cells are metabolically  
422 coupled through processes that rely on diffusion of enzymes, nutrients and metabolites. While  
423 the number and properties of the diffusing compounds are not known in detail, using the  
424 inverse distance squared takes into account the fact that the diffusional coupling between  
425 cells decreases rapidly with their distance. Alternative proxies to determine the weighted  
426 density were calculated the same way using the inverse distance or the inverse distance cubed

427 instead of the inverse distance squared. Lineage trees were generated with the R package  
428 *plot3Drgl* v1.0.2. Visualization of ridged plots was done with the R package *ggridges* v0.5.3.  
429 For all other plots a combination of the R packages *ggplot2* v3.3.5 and *ggpubr* v0.4.0.

430

### 431 **Datasets and statistical analysis**

432 Microfluidics experiments were performed in 3 biological replicates. From each of the  
433 replicates, 4 of the 8 imaged microfluidic growth chambers per strain and per carbon source  
434 were randomly chosen. In total, 12 microfluidic growth chambers for each strain on each  
435 carbon source were analyzed. For xylan, 28'723 wildtype, 20'195  $\Delta pilA$ , 19'586  $\Delta hfsA$ , and  
436 37'776  $\Delta flgH$  cells were analyzed; for xylose, 436 wildtype, 421  $\Delta pilA$ , 388  $\Delta hfsA$ , and 1'355  
437  $\Delta flgH$  cells were analyzed; and for glucose, 938 wildtype, 652  $\Delta pilA$ , 663  $\Delta hfsA$ , and 2'197  
438  $\Delta flgH$  cells were analyzed. For statistical analysis of the effect of extracellular appendage  
439 knockout on local cell density and single-cell growth rate, cells were aggregated at the growth  
440 chamber level by taking the median values for each growth chamber. The data was log-  
441 transformed and a linear mixed-effects model was fitted for each carbon source. The model  
442 integrated the separate experiments and growth chambers as random effects and the strains  
443 as fixed effect. Statistical analysis was performed in R Studio v2021.09.1 (44) with R v4.1.2  
444 using the R packages *lmerTest* v3.1.3, *lme4* v1.1.27.1, and *multcomp* v1.4.17. In comparisons,  
445 a  $p$ -value  $< 0.05$  was considered significant.

## 446 ACKNOWLEDGMENTS

447

448 We thank Johannes Keegstra, Jonasz Słomka, and Nicola Zamboni for helpful feedback and  
449 discussions, Zemer Gitai for the fluorescent phenotypic marker plasmid. Further we thank  
450 Russell Naisbit for editorial support for the manuscript. This project was funded by the Swiss  
451 National Science Foundation (grant number 31003A\_169978) to MA, an ETH fellowship and a  
452 Marie Curie Actions for People COFUND program fellowship (FEL-37-16-1) to GD, an ETH  
453 Career Seed Grant (SEED-14 18-1) to GD, the Simons Foundation Collaboration on Principles  
454 of Microbial Ecosystems (PriME grant number 542389) to MA, and by ETH Zurich and Eawag.

455

### 456 **Author contributions**

457 VP conceptualized the research and designed the experiments with input from GD, MA, AK,  
458 and UJ. AK and UJ provided the mutant strains. VP performed all experiments and analyzed  
459 the data with advice from GD and MA. AS developed the single-cell growth rate computation  
460 for tracked cells. VP wrote the manuscript with input from GD, AK, AS, UJ, and MA.

461

### 462 **Competing interests**

463 The authors declare no competing interests.

## 464 REFERENCES

465

- 466 1. J. M. Grondin, K. Tamura, G. Dejean, D. W. Abbott, H. Brumer, Polysaccharide  
467 Utilization Loci: Fueling Microbial Communities. *J Bacteriol* **199**, (2017).
- 468 2. R. Berlemont, A. C. Martiny, Genomic potential for polysaccharide deconstruction in  
469 bacteria. *Appl Environ Microbiol* **81**, 1513-1519 (2015).
- 470 3. P. G. Falkowski, T. Fenchel, E. F. Delong, The microbial engines that drive Earth's  
471 biogeochemical cycles. *Science* **320**, 1034-1039 (2008).
- 472 4. M. L. Leth *et al.*, Differential bacterial capture and transport preferences facilitate co-  
473 growth on dietary xylan in the human gut. *Nat Microbiol* **3**, 570-580 (2018).
- 474 5. H. J. Flint, K. P. Scott, S. H. Duncan, P. Louis, E. Forano, Microbial degradation of  
475 complex carbohydrates in the gut. *Gut Microbes* **3**, 289-306 (2012).
- 476 6. S. Gupta *et al.*, Investigating the dynamics of microbial consortia in spatially  
477 structured environments. *Nat Commun* **11**, 2418 (2020).
- 478 7. G. E. Leventhal, M. Ackermann, K. T. Schiessl, Why microbes secrete molecules to  
479 modify their environment: the case of iron-chelating siderophores. *J R Soc Interface*  
480 **16**, 20180674 (2019).
- 481 8. A. Ebrahimi, J. Schwartzman, O. X. Cordero, Cooperation and spatial self-organization  
482 determine rate and efficiency of particulate organic matter degradation in marine  
483 bacteria. *Proc Natl Acad Sci U S A* **116**, 23309-23316 (2019).
- 484 9. A. Ebrahimi, J. Schwartzman, O. X. Cordero, Multicellular behaviour enables  
485 cooperation in microbial cell aggregates. *Philos Trans R Soc Lond B Biol Sci* **374**,  
486 20190077 (2019).
- 487 10. G. G. D'Souza, V. R. Povolo, J. M. Keegstra, R. Stocker, M. Ackermann, Nutrient  
488 complexity triggers transitions between solitary and colonial growth in bacterial  
489 populations. *ISME J*, (2021).
- 490 11. A. S. Griffin, S. A. West, A. Buckling, Cooperation and competition in pathogenic  
491 bacteria. *Nature* **430**, 1024-1027 (2004).
- 492 12. C. D. Nadell, K. Drescher, K. R. Foster, Spatial structure, cooperation and competition  
493 in biofilms. *Nat Rev Microbiol* **14**, 589-600 (2016).
- 494 13. K. Drescher, C. D. Nadell, H. A. Stone, N. S. Wingreen, B. L. Bassler, Solutions to the  
495 public goods dilemma in bacterial biofilms. *Curr Biol* **24**, 50-55 (2014).



- 496 14. R. C. Wilhelm, Following the terrestrial tracks of Caulobacter - redefining the ecology  
497 of a reputed aquatic oligotroph. *ISME J* **12**, 3025-3037 (2018).
- 498 15. D. Bieber *et al.*, Type IV pili, transient bacterial aggregates, and virulence of  
499 enteropathogenic *Escherichia coli*. *Science* **280**, 2114-2118 (1998).
- 500 16. J. Chamot-Rooke *et al.*, Posttranslational modification of pili upon cell contact  
501 triggers *N. meningitidis* dissemination. *Science* **331**, 778-782 (2011).
- 502 17. P. D. Curtis, Y. V. Brun, Getting in the loop: regulation of development in *Caulobacter*  
503 *crescentus*. *Microbiol Mol Biol Rev* **74**, 13-41 (2010).
- 504 18. D. Bodenmiller, E. Toh, Y. V. Brun, Development of surface adhesion in *Caulobacter*  
505 *crescentus*. *J Bacteriol* **186**, 1438-1447 (2004).
- 506 19. M. Hernando-Perez *et al.*, Layered Structure and Complex Mechanochemistry  
507 Underlie Strength and Versatility in a Bacterial Adhesive. *mBio* **9**, (2018).
- 508 20. J. L. Stovepoindecker, G. Cohen-Bazire, The Fine Structure of Stalked Bacteria  
509 Belonging to the Family Caulobacteraceae. *J Cell Biol* **23**, 587-607 (1964).
- 510 21. M. M. Ireland, J. A. Karty, E. M. Quardokus, J. P. Reilly, Y. V. Brun, Proteomic analysis  
511 of the *Caulobacter crescentus* stalk indicates competence for nutrient uptake. *Mol*  
512 *Microbiol* **45**, 1029-1041 (2002).
- 513 22. A. Persat, H. A. Stone, Z. Gitai, The curved shape of *Caulobacter crescentus* enhances  
514 surface colonization in flow. *Nat Commun* **5**, 3824 (2014).
- 515 23. C. K. Ellison *et al.*, Obstruction of pilus retraction stimulates bacterial surface sensing.  
516 *Science* **358**, 535-538 (2017).
- 517 24. R. A. Snyder *et al.*, Surface sensing stimulates cellular differentiation in *Caulobacter*  
518 *crescentus*. *Proc Natl Acad Sci U S A* **117**, 17984-17991 (2020).
- 519 25. M. Sangermani, I. Hug, N. Sauter, T. Pfohl, U. Jenal, Tad Pili Play a Dynamic Role in  
520 *Caulobacter crescentus* Surface Colonization. *mBio* **10**, (2019).
- 521 26. I. Hug, S. Deshpande, K. S. Sprecher, T. Pfohl, U. Jenal, Second messenger-mediated  
522 tactile response by a bacterial rotary motor. *Science* **358**, 531-534 (2017).
- 523 27. J. Nesper *et al.*, Cyclic di-GMP differentially tunes a bacterial flagellar motor through  
524 a novel class of CheY-like regulators. *Elife* **6**, (2017).
- 525 28. P. Entcheva-Dimitrov, A. M. Spormann, Dynamics and control of biofilms of the  
526 oligotrophic bacterium *Caulobacter crescentus*. *J Bacteriol* **186**, 8254-8266 (2004).

- 527 29. A. Fiebig *et al.*, A cell cycle and nutritional checkpoint controlling bacterial surface  
528 adhesion. *PLoS Genet* **10**, e1004101 (2014).
- 529 30. R. Mathis, M. Ackermann, Asymmetric cellular memory in bacteria exposed to  
530 antibiotics. *BMC Evol Biol* **17**, 73 (2017).
- 531 31. A. Dal Co, M. Ackermann, S. van Vliet, Metabolic activity affects the response of  
532 single cells to a nutrient switch in structured populations. *J R Soc Interface* **16**,  
533 20190182 (2019).
- 534 32. J. S. Poindexter, The caulobacters: ubiquitous unusual bacteria. *Microbiol Rev* **45**,  
535 123-179 (1981).
- 536 33. C. Berne *et al.*, Feedback regulation of *Caulobacter crescentus* holdfast synthesis by  
537 flagellum assembly via the holdfast inhibitor HfiA. *Mol Microbiol* **110**, 219-238 (2018).
- 538 34. D. M. Hershey, A. Fiebig, S. Crosson, A Genome-Wide Analysis of Adhesion in  
539 *Caulobacter crescentus* Identifies New Regulatory and Biosynthetic Components for  
540 Holdfast Assembly. *mBio* **10**, (2019).
- 541 35. L. Del Medico, D. Cerletti, P. Schachle, M. Christen, B. Christen, The type IV pilin Pila  
542 couples surface attachment and cell-cycle initiation in *Caulobacter crescentus*. *Proc*  
543 *Natl Acad Sci U S A* **117**, 9546-9553 (2020).
- 544 36. H. C. Flemming, S. Wuertz, Bacteria and archaea on Earth and their abundance in  
545 biofilms. *Nat Rev Microbiol* **17**, 247-260 (2019).
- 546 37. S. K. Govers, C. Jacobs-Wagner, *Caulobacter crescentus*: model system  
547 extraordinaire. *Curr Biol* **30**, R1151-R1158 (2020).
- 548 38. M. T. Laub, L. Shapiro, H. H. McAdams, Systems biology of *Caulobacter*. *Annu Rev*  
549 *Genet* **41**, 429-441 (2007).
- 550 39. M. Ackermann, S. C. Stearns, U. Jenal, Senescence in a bacterium with asymmetric  
551 division. *Science* **300**, 1920 (2003).
- 552 40. J. Schindelin *et al.*, Fiji: an open-source platform for biological-image analysis. *Nat*  
553 *Methods* **9**, 676-682 (2012).
- 554 41. S. Stylianidou, C. Brennan, S. B. Nissen, N. J. Kuwada, P. A. Wiggins, SuperSegger:  
555 robust image segmentation, analysis and lineage tracking of bacterial cells. *Mol*  
556 *Microbiol* **102**, 690-700 (2016).

- 557 42. S. van Vliet *et al.*, Spatially Correlated Gene Expression in Bacterial Groups: The Role  
558 of Lineage History, Spatial Gradients, and Cell-Cell Interactions. *Cell Syst* **6**, 496-507  
559 e496 (2018).
- 560 43. C. Sommer, C. Straehle, U. Kothe, F. A. Hamprecht, Ilastik: Interactive Learning and  
561 Segmentation Toolkit. *I S Biomed Imaging*, 230-233 (2011).
- 562 44. RStudio Team, RStudio: Integrated Development Environment for R. *RStudio, PBC,*  
563 *Boston, MA*, URL <http://www.rstudio.com/> (2021).
- 564 45. A. Baddeley, E. Rubak, R. Turner, Spatial Point Patterns: Methodology and  
565 Applications with R. *Chap Hall Crc Interd*, 1-810 (2016).
